# Supplementary material for: Genetic diversity and structure of Bipolaris oryzae and Exserohilum rostratum populations causing brown spot of rice in Burkina Faso based on genotyping-by-sequencing
Source: Frontiers journal article supplement (doi:10.3389/fpls.2022.1022348), 2022-11-25

**Supplementary Figure 7.** Phylogenetic tree of *E. rostratum* populations made by RaxML from a maximum likelihood analysis. The different colors represent the four genetic clusters identified by DAPC.


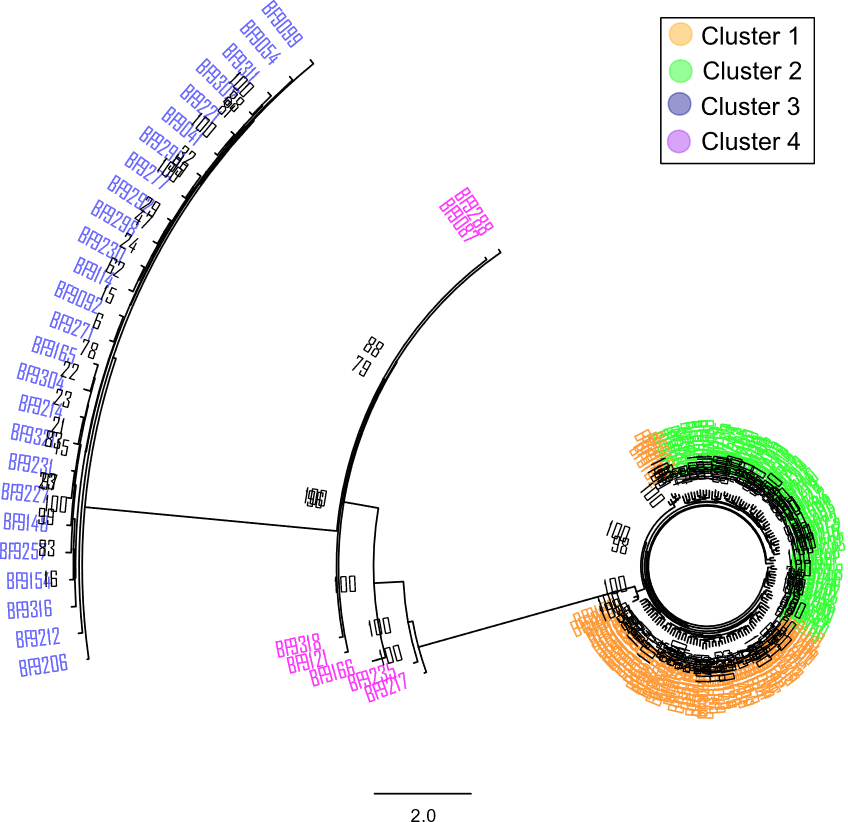

Supplement: Data_Sheet_1.ZIP [file Data_Sheet_1.ZIP]
